# Supplementary material
Source: Springer Nature journal article supplement (https://www.springermedizin.de/resource/supplementary/12955_2012_1152_MOESM5_ESM.pdf/9559344)
Supplement: MOESM5 [file 9559344]

**For each statement please tick one box**

**E**

## **PHYSICAL**

***The following statements refer to the influence of your chronic condition on your decisions about your physical aspects of life.***

|                                                         | No influence OR<br>Not applicable | Slight influence         | Moderate influence       | Strong influence         | Very strong<br>influence |
|---------------------------------------------------------|-----------------------------------|--------------------------|--------------------------|--------------------------|--------------------------|
| 1. I decided not to go swimming                         | <input type="checkbox"/>          | <input type="checkbox"/> | <input type="checkbox"/> | <input type="checkbox"/> | <input type="checkbox"/> |
| 2. I decided not to take part in any sports activities  | <input type="checkbox"/>          | <input type="checkbox"/> | <input type="checkbox"/> | <input type="checkbox"/> | <input type="checkbox"/> |
| 3. I decided to change to different sporting activities | <input type="checkbox"/>          | <input type="checkbox"/> | <input type="checkbox"/> | <input type="checkbox"/> | <input type="checkbox"/> |
| 4. I decided to be more physically active               | <input type="checkbox"/>          | <input type="checkbox"/> | <input type="checkbox"/> | <input type="checkbox"/> | <input type="checkbox"/> |
| 5. I decided to give up driving                         | <input type="checkbox"/>          | <input type="checkbox"/> | <input type="checkbox"/> | <input type="checkbox"/> | <input type="checkbox"/> |

**Please check you have answered all the statements**

***Thank you for your help***

This questionnaire is not to be reproduced or photocopied without the permission of the authors

© Z U Bhatti, M S Salek, A Y Finlay, April 2011

Date: 04.04.2011

Version 2
